# Supplementary material for: Rtt107 Phosphorylation Promotes Localisation to DNA Double-Stranded Breaks (DSBs) and Recombinational Repair between Sister Chromatids
Source: PLOS journal article supplement (doi:10.1371/journal.pone.0020152), 2011-05-25
Supplement: S3 (10.1371/journal.pone.0020152.s003) [file journal.pone.0020152.s003]

**Table S1.** Yeast strains used

| **Strain** | **Relevant genotype** | | **Reference** |
| --- | --- | --- | --- |
| CCG2781 | MATalpha ade1-100 leu2,3-112 lys5 ura3-52 trp::hisG ho∆ hml::ADE1 hmr::ADE1 ade3::GAL-HO DDC2-GFP KanMX4 | L. Aragón | |
| CCG6365 | MATa his3∆1 leu2∆0 met15∆0 ura3∆0 smc6::smc6-9ts-3HA-NATNT2 rtt107::RTT107-9MYC-KANMX4 | | This study |
| CCG6683 | MATa his3∆1 leu2∆0 met15∆0 ura3∆0 rad9::KANMX4 rtt107::RTT107-9MYC- HIS3 | | This study |
| CCG6720 | Mata his3∆1 leu2∆0 met15∆0 ura3∆0 mrc1::kanMX4 rtt107::RTT107-9MYC NATNT2 | This study | |
| CCG6983 | MATalpha ade1-100 leu2,3-112 lys5 ura3-52 trp::hisG hoD hml::ADE1 hmr::ADE1 ade3::GAL-HO DDC2-GFP KanMX4 esc4:: RTT107-9MYC- HPHNT | This study | |
| CCG6886 | MATa ho ade2-1 trp1-1 can1-100 leu2-3,112 his3-11,15 ura3-1 rtt107::RTT107-9MYC-KANMX4 | This study | |
| CCG6887 | MATa ho ade2-1 trp1-1 can1-100 leu2-3,112 his3-11,15 ura3-1 mec1::TRP1 sml1:HIS3 rtt107::RTT107-9MYC-KANMX4 | | This study |
| CCG6888 | MATa ho ade2-1 trp1-1 can1-100 leu2-3,112 his3-11,15 ura3-1 rad53::HIS3 sml1:: sml1-1 rtt107::RTT107-9MYC-KANMX4 | This study | |
| CCG6890 | *Mata his3*∆*1 leu2*∆*0 met15*∆*0 ura3*∆*0 trp*∆*63 chk1::kanMX4 rtt107::RTT107-9MYC- (HYG)* | This study | |
| CCG6985 | *MATalpha ade1-100 leu2,3-112 lys5 ura3-52 trp::hisG hoD hml::ADE1 hmr::ADE1 ade3::GAL-HO smc6::smc6-9ts-3HA-NATNT2 ddc2::DDC2- GFP-KANMX4 esc4:: ESC4-9MYC-HPHNT* | This study | |
| CCG7143 | *MATalpha ade1-100 leu2,3-112 lys5 ura3-52 trp::hisG ho*∆ *hml::ADE1 hmr::ADE1 ade3::GAL-HO mec1::NATNT2 sml1::KANMX4* rtt107::RTT107-9MYC *HPHNT ddc1::DDC1-GFP-TRP1* | This study | |
| CCG7290 | *MATalpha ade1-100 leu2,3-112 lys5 ura3-52 trp1::hisG ho∆ hml::ADE1 hmr::ADE1 ade3::GAL-HO ddc2::DDC2- GFP-KANMX4 rtt107::HPHNT GAL-RTT107-6HA-URA3* | This study | |
| CCG7291 | *MATalpha ade1-100 leu2,3-112 lys5 ura3-52 trp1::hisG ho∆ hml::ADE1 hmr::ADE1 ade3::GAL-HO ddc2::DDC2- GFP-KANMX4 rtt107::HPHNT GAL-RTT107-AQ-6HA-URA3* | This study | |
| CCG7556 | *MATalpha ade1-100 leu2,3-112 lys5 ura3-52 trp::hisG ho∆ hml::ADE1 hmr::ADE1 ade3::GAL-HO mec1::NATNT2 sml1::KANMX4 ddc1::DDC1-GFP-TRP1 rtt107::HPHNT GAL-RTT107-AQ-6HA-URA3* | This study | |
| CCG7558 | *MATalpha ade1-100 leu2,3-112 lys5 ura3-52 trp::hisG ho∆ hml::ADE1 hmr::ADE1 ade3::GAL-HO mec1::NATNT2 sml1::KANMX4 ddc1::DDC1-GFP-TRP1 rtt107::HPHNT GAL-RTT107-6HA-URA3* | This study | |
| CCG7802 | *MAT alpha ade2-n::TRP1::ade2-I* | L. Symington | |
| CCG7804 | *MAT alpha ade2-n::TRP1::ade2-I rad55::His3MX6* | L. Symington | |
| CCG7855 | *MAT alpha ade2-n::TRP1::ade2-I rtt107::KANMX4* | This study | |
| CCG7856 | *MAT alpha ade2-n::TRP1::ade2-I smc6::smc6-9ts-3HA-NATNT2* | This study | |
| CCG7967 | *MATa bar1∆::ADE3 ade1-100 leu2,3-112 lys5 ura3-52 trp::hisG ho∆ hml::ADE1 hmr::ADE1 ade3::GAL-HO tel1::TRP1 DDC2-GFP KanMX4 rtt107:: RTT107-9MYC-HPHNT* | This study | |
| CCG7968 | *MATa bar1∆::ADE3 ade1-100 leu2,3-112 lys5 ura3-52 trp::hisG ho∆ hml::ADE1 hmr::ADE1 ade3::GAL-HO rad53::NATNT2 DDC2-GFP KanMX4 rtt107:: RTT107-9MYC-HPHNT* | This study | |
| CCG7969 | *MATalpha ade1-100 leu2,3-112 lys5 ura3-52 trp::hisG ho∆ hml::ADE1 hmr::ADE1 ade3::GAL-HO DDC2-GFP KanMX4 rtt107:: RTT107-9MYC- HPHNT rtt101::NATNT2* | This study | |
| CCG7970 | *MATalpha ade1-100 leu2,3-112 lys5 ura3-52 trp::hisG ho∆ hml::ADE1 hmr::ADE1 ade3::GAL-HO DDC2-GFP KanMX4 rtt107:: RTT107-9MYC- HPHNT slx4::NATNT2* | This study | |
| CCG8214 | *MAT ade2-n::TRP1::ade2-I esc4::KANMX4 GAL-RTT107-6HA-URA3* | This study | |
| CCG8215 | *MAT ade2-n::TRP1::ade2-I esc4::KANMX4 GAL-RTT107-AQ-6HA-URA3* | This study | |
| CCG8216 | *MAT ade2-n::TRP1::ade2-I esc4::KANMX4 GAL-RTT107-DQ-6HA-URA3* | This study | |
